# Supplementary material
Source: publisher site journal article supplement (https://www.spandidos-publications.com/3727/downloadSupplementary)

Figure S1. The methylation levels of the *ALOX5AP* promoter correlated inversely with *ALOX5AP* expression in IS subjects. The abscissa represents the mean methylation levels of the *ALOX5AP* gene and the abscissa represents the mRNA level of *ALOX5AP*. *ALOX5AP*; arachidonate 5-lipoxygenase-activating protein.

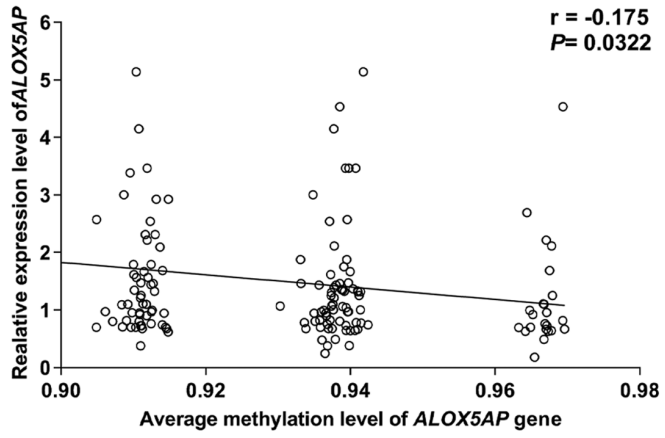

Figure S2. Mean DNA methylation of the *ALOX5AP* promoter region in the peripheral blood of IS group and control group between different sexes. *ALOX5AP*; arachidonate 5-lipoxygenase-activating protein.

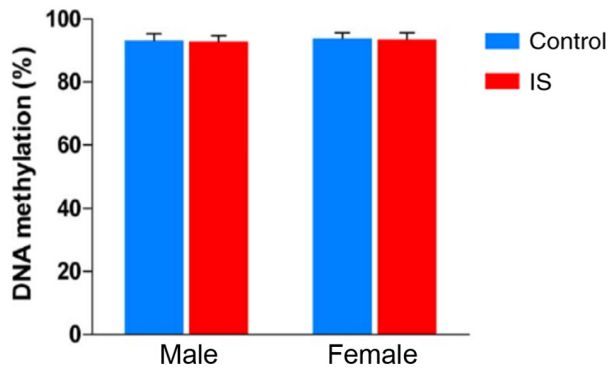

Supplement: Supplementary file 1 [file downloadSupplementary]
